# Supplementary material for: A Dual Adjuvant System for Intranasal Boosting of Local and Systemic Immunity for Influenza Vaccination
Source: MDPI journal article supplement (doi:10.3390/vaccines10101694), 2022-10-11
Supplement: s1 [file s1]

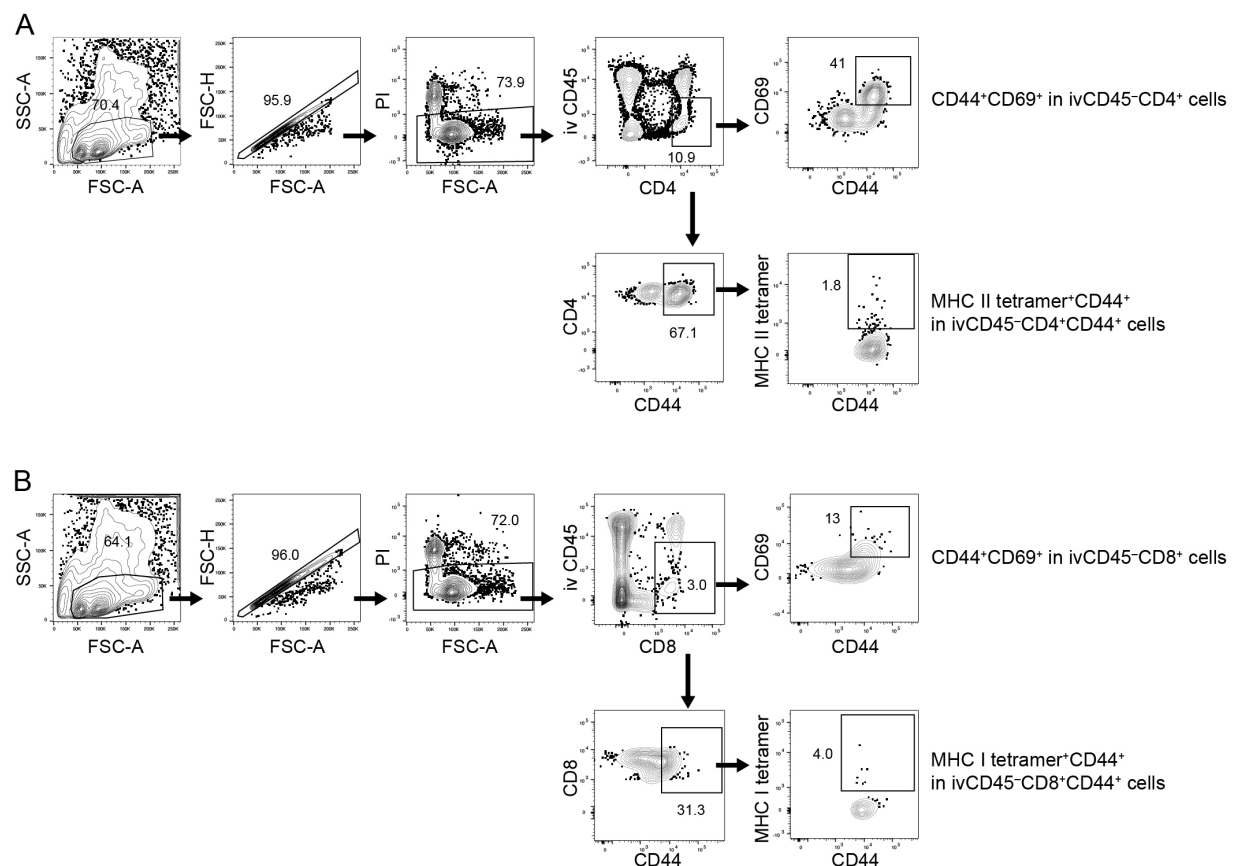

**Figure S1. Gating strategies for T cell subsets in the lung.** Non-circulating (tissue-resident) ivCD45<sup>-</sup>CD4<sup>+</sup> T cells (**A**) and ivCD45<sup>-</sup>CD8<sup>+</sup> T cells (**B**) in the lung were analyzed by flow cytometry. CD69<sup>+</sup>CD44<sup>+</sup> T cells, MHC class II or MHC class I tetramer<sup>+</sup> memory T cells were subsequently identified. Antibodies and reagents used in this assay are described in Table S3.

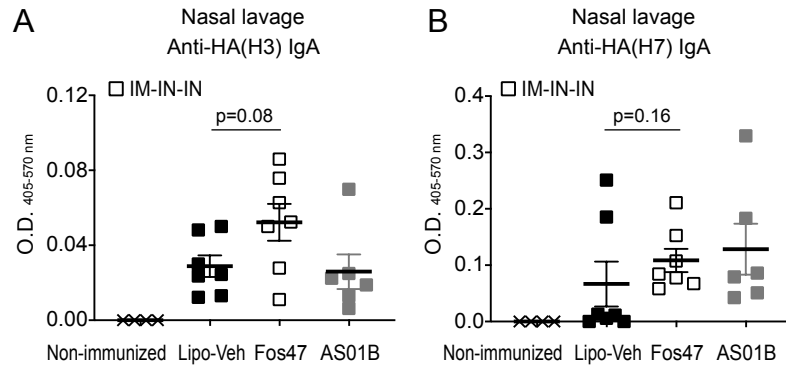

**Figure S2. Cross-reactive IgA in nasal lavage induced by IN boosting with Fos47.** Cross-reactivity against antigenically distinct heterologous virus strains, A/Victoria/3/1975(H3N2) and A/Netherlands/219/2003(H7N7) were tested in this assay. Female BALB/c (n=6-7/group) mice were vaccinated with IIAV plus Lipo-Veh, Fos47 or AS01B by IM-IN-IN regimen. Nasal lavage and BALF were collected on day 35. Non-immunized mice served as a negative control. IgA binding to recombinant HA protein of A/Victoria/3/1975(H3N2), or A/Netherlands/219/2003(H7N7) were evaluated by ELISA. **(A)** Anti-HA(H3) IgA in nasal lavage. **(B)** Anti-HA(H7) IgA in nasal lavage. Bars indicate means  $\pm$  SEM. *P*-values are presented. Two-tailed Mann-Whitney *U*-test to compare IN-Lipo-Veh and IN-Fos47.

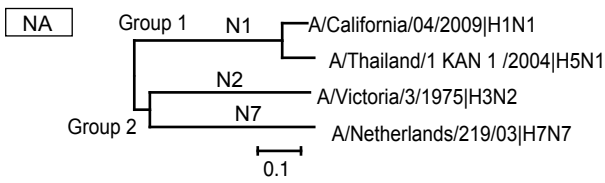

**Figure S3. Phylogenetic relationship of NA proteins used in the cross-reactivity study (Figure 5).** Amino acid sequences of proteins used in this study were aligned by the MUSCLE algorithm using the Influenza Research Database. Phylogenetic trees were constructed by the neighbor-joining method using MEGAX software. A/California/04/2009(H1N1pdm09) was used for vaccination. Cross-reactivity against N7 of A/Netherlands/219/2003(H7N7) were evaluated by ELISA. A/Thailand/1 KAN 1/2001(H5N1) and A/Victoria/3/1975(H3N2) are shown as a reference.

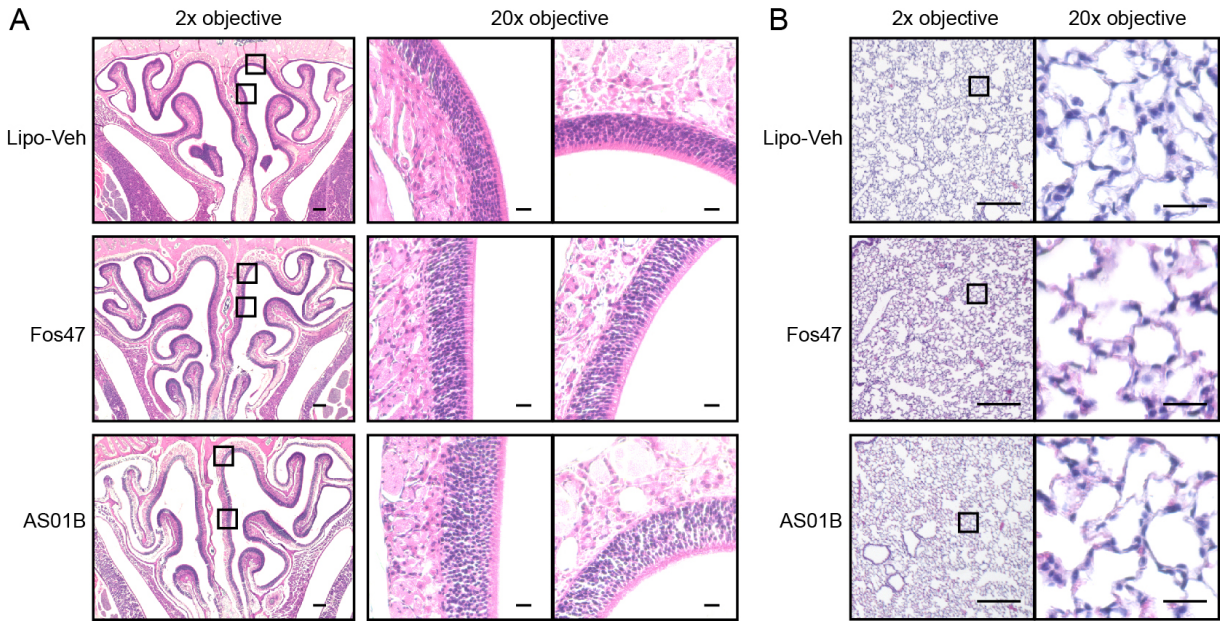

**Figure S4. H&E staining of nostril and lung sections.** Female BALB/c mice (n=3/group) were IN administered with 25  $\mu\text{L}$  Lipo-Veh, Fos47 or AS01B. Head/nose and lung samples were collected at 24 h after IN administration. **(A and B)** Histologic analysis of nasal cavity **(A)** and lungs **(B)**. Paraffin cross-section of lungs (5  $\mu\text{m}$  thickness) were stained with HE. Low and high magnification images were obtained using 2 $\times$  and 20 $\times$  objective lenses, respectively. Scale bars indicates 200  $\mu\text{m}$  and 20  $\mu\text{m}$  in 2 $\times$  objective and 20 $\times$  objective, respectively.

**Table S1. Reagents used in ELISA for IgG and IgA**

| <b>Reagents</b>                                                                   |                                      | <b>Source</b>       | <b>Catalog #</b> |
|-----------------------------------------------------------------------------------|--------------------------------------|---------------------|------------------|
| <i>Proteins for coating</i>                                                       | <i>Concentrations</i>                |                     |                  |
| Influenza A H1N1 (A/California/04/2009)<br>Hemagglutinin / HA Protein (His Tag)   | 100 ng/mL for IgG<br>1 µg/mL for IgA | Sino<br>Biological  | 11055-V08B       |
| Influenza A H1N1 (A/Puerto Rico/8/1934)<br>Hemagglutinin / HA Protein (His Tag)   | 100 ng/mL for IgG<br>1 µg/mL for IgA | Sino<br>Biological  | 11684-V08B       |
| Influenza A H7N7 (A/Netherlands/219/2003)<br>Hemagglutinin / HA Protein (His Tag) | 100 ng/mL for IgG<br>1 µg/mL for IgA | Sino<br>Biological  | 11082-V08B       |
| Influenza A H3N2 (A/Victoria/3/1975)<br>Hemagglutinin / HA1 Protein (His Tag)     | 1 µg/mL for IgA                      | Sino<br>Biological  | 40396-<br>V08H1  |
| Influenza A H1N1 (A/California/04/2009)<br>Neuraminidase / NA (His Tag)           | 100 ng/mL for IgG                    | Sino<br>Biological  | 11058-V07B       |
| Influenza A H7N7 (A/Netherlands/219/2003)<br>Neuraminidase / NA Protein (His Tag) | 100 ng/mL for IgG                    | Sino<br>Biological  | 40202-V07H       |
|                                                                                   |                                      |                     |                  |
| <i>Antibodies</i>                                                                 | <i>Dilution factor</i>               |                     |                  |
| IgG1-AP goat anti-mouse                                                           | 1000                                 | Southern<br>Biotech | 1070-04          |
| IgG2a-AP goat anti-mouse                                                          | 1000                                 | Southern<br>Biotech | 1080-04          |
| IgG-AP goat anti-mouse                                                            | 1000                                 | Southern<br>Biotech | 1030-04          |
| IgA-AP goat anti-mouse                                                            | 500                                  | Southern<br>Biotech | 1040-04          |
| p-Nitrophenyl Phosphate tablets (pNPP)                                            |                                      | Sigma               | N2770            |

**Table S2. Sample dilutions for IgG and IgA evaluation**

| <b>Sample types</b>                             | <b>Sample dilutions</b>                   |
|-------------------------------------------------|-------------------------------------------|
| <b>IgG and IgA against homologous strain</b>    |                                           |
| Serum for IgG                                   | 4-fold serial dilution (1:50 to 1:204800) |
| Serum for IgA                                   | 3-fold serial dilution (1:20 to 1:180)    |
| BALF                                            | 1:10                                      |
| Nasal wash                                      | 1:10                                      |
|                                                 |                                           |
| <b>IgG and IgA against heterologous strains</b> |                                           |
| Serum for IgG                                   | 4-fold serial dilution (1:50 to 1:204800) |
| BALF                                            | 1:10 for H1RP8 and H7<br>1:2 for H3       |
| Nasal wash                                      | 1:2                                       |

**Table S3. Antibodies used in flow cytometric analysis**

| <b>Antibodies (clone)</b>                                 | <b>Dilution Factor</b> | <b>Source</b>              | <b>Catalog #</b> |
|-----------------------------------------------------------|------------------------|----------------------------|------------------|
| Anti-CD4, APC/Cy7 (RM4.5)                                 | 300                    | BD Biosciences             | 565650           |
| Anti-CD8, APC/Cy7 (53-6.7)                                | 300                    | BD Biosciences             | 557654           |
| Anti-CD44, FITC (IM7)                                     | 1200                   | BD Biosciences             | 553133           |
| Anti-CD69, APC (H1.2F3)                                   | 100                    | eBiosciences               | 17-0691-82       |
| Anti-CD16/32 (2.4G2)                                      | 300                    | BD Biosciences             | 553142           |
| <b>Other reagents</b>                                     |                        |                            |                  |
| BD Stain Buffer                                           |                        | BD Biosciences             | 554657           |
| Propidium Iodide Staining Solution                        | 400                    | BD Biosciences             | 556463           |
| Class I MHC [H-2K(d)] tetramer, IYSTVASSL (533-541), PE   | 200                    | NIH tetramer core facility |                  |
| Class II MHC [I-E(d)] tetramer, SFERFEIFPKE (127-137), PE | 100                    | NIH tetramer core facility |                  |
| <b><i>In vivo</i> labeling</b>                            |                        |                            |                  |
| Anti-CD45, PE/Cy7 (30-F11)                                | 2.4 µg/ injection      | BioLegend                  | 103114           |

**Table S4. Reagents used in ELISA**

| <b>Reagents</b>                        | <b>Dilution Factor</b> | <b>Source</b>            | <b>Catalog #</b> |
|----------------------------------------|------------------------|--------------------------|------------------|
| Purified rat anti-mouse IL-5           | 500                    | BD Biosciences           | 554393           |
| Biotin rat anti-mouse IL-5             | 1000                   | BD Biosciences           | 554379           |
| Streptavidin-HRP                       | 1000                   | Thermo Fisher Scientific | 434323           |
| KPL SureBlue™ TMB Peroxidase Substrate |                        | Seracare                 | 5120-0077        |
| Mouse IFN-gamma DuoSet                 |                        | R&D Systems              | DY485            |
| Mouse IL-17 DuoSet                     |                        | R&D Systems              | DY142            |

**Table S5. Complete blood counts on days 1 and 7**

| <b>Day 1</b>                                          | <b>PBS</b>        | <b>Lipo-Veh</b>   | <b>Fos47</b>      | <b>AS01B</b>      |
|-------------------------------------------------------|-------------------|-------------------|-------------------|-------------------|
| <b>Parameters (units)</b>                             | Mean $\pm$ SEM    | Mean $\pm$ SEM    | Mean $\pm$ SEM    | Mean $\pm$ SEM    |
| White blood cells ( $\times 10^3/\mu\text{L}$ )       | 8.4 $\pm$ 0.8     | 8.6 $\pm$ 0.4     | 9.5 $\pm$ 0.7     | 8.7 $\pm$ 0.4     |
| Segmented neutrophils # ( $\times 10^3/\mu\text{L}$ ) | 3.4 $\pm$ 0.3     | 3.3 $\pm$ 0.2     | 3.5 $\pm$ 0.2     | 3.6 $\pm$ 0.2     |
| Lymphocytes # ( $\times 10^3/\mu\text{L}$ )           | 0.6 $\pm$ 0.1     | 0.7 $\pm$ 0.1     | 0.8 $\pm$ 0.1     | 0.6 $\pm$ 0.1     |
| Monocytes # ( $\times 10^3/\mu\text{L}$ )             | 2.9 $\pm$ 0.3     | 3.3 $\pm$ 0.2     | 3.8 $\pm$ 0.3     | 3.1 $\pm$ 0.2     |
| Eosinophils # ( $\times 10^3/\mu\text{L}$ )           | 1.5 $\pm$ 0.2     | 1.2 $\pm$ 0.2     | 1.3 $\pm$ 0.1     | 1.4 $\pm$ 0.1     |
| Basophils # ( $\times 10^3/\mu\text{L}$ )             | 0.040 $\pm$ 0.010 | 0.037 $\pm$ 0.009 | 0.057 $\pm$ 0.003 | 0.033 $\pm$ 0.007 |
| Segmented neutrophils (%)                             | 40.4 $\pm$ 2.1    | 38.7 $\pm$ 2.1    | 37.4 $\pm$ 0.4    | 41.0 $\pm$ 1.0    |
| Lymphocytes (%)                                       | 6.9 $\pm$ 0.9     | 8.7 $\pm$ 1.2     | 8.7 $\pm$ 0.9     | 6.4 $\pm$ 1.2     |
| Monocytes (%)                                         | 34.4 $\pm$ 2.6    | 38.1 $\pm$ 1.4    | 39.8 $\pm$ 0.9    | 35.9 $\pm$ 0.8    |
| Eosinophils (%)                                       | 17.8 $\pm$ 0.5    | 14.2 $\pm$ 1.3    | 13.5 $\pm$ 0.4    | 16.3 $\pm$ 1.8    |
| Basophils (%)                                         | 0.5 $\pm$ 0.1     | 0.4 $\pm$ 0.1     | 0.6 $\pm$ 0.1     | 0.4 $\pm$ 0.1     |
| Red blood cells (%)                                   | 8.9 $\pm$ 0.2     | 9.1 $\pm$ 0.1     | 9.3 $\pm$ 0.1     | 8.8 $\pm$ 0.1     |
| Hemoglobin (g/dL)                                     | 13.8 $\pm$ 0.4    | 14.5 $\pm$ 0.2    | 14.6 $\pm$ 0.2    | 14.2 $\pm$ 0.2    |
| Hematocrit (%)                                        | 49.5 $\pm$ 0.8    | 50.4 $\pm$ 0.1    | 51.7 $\pm$ 0.2    | 50.1 $\pm$ 0.9    |
| Mean corpuscular volume (fL)                          | 56.0 $\pm$ 0.6    | 55.5 $\pm$ 0.8    | 55.9 $\pm$ 0.7    | 56.7 $\pm$ 0.4    |
| Mean corpuscular hemoglobin (Pg)                      | 15.6 $\pm$ 0.1    | 16.0 $\pm$ 0.1    | 15.8 $\pm$ 0.4    | 16.1 $\pm$ 0.2    |
| Mean corpuscular hemoglobin concentration (g/dL)      | 27.9 $\pm$ 0.3    | 28.8 $\pm$ 0.3    | 28.3 $\pm$ 0.3    | 28.4 $\pm$ 0.2    |
| Red blood cell distribution width (%)                 | 19.8 $\pm$ 0.8    | 18.6 $\pm$ 0.5    | 19.3 $\pm$ 0.3    | 18.6 $\pm$ 0.1    |
| Platelets ( $\times 10^3/\mu\text{L}$ )               | 798.3 $\pm$ 8.7   | 774.7 $\pm$ 25.6  | 774.0 $\pm$ 2.0   | 716.0 $\pm$ 35.8  |
| Mean platelet volume (fL)                             | 5.2 $\pm$ 0.1     | 4.8 $\pm$ 0.1*    | 5.0 $\pm$ 0.1     | 5.0 $\pm$ 0.1     |
|                                                       |                   |                   |                   |                   |
| <b>Day 7</b>                                          | <b>PBS</b>        | <b>Lipo-Veh</b>   | <b>Fos47</b>      | <b>AS01B</b>      |
| <b>Parameters (units)</b>                             | Mean $\pm$ SEM    | Mean $\pm$ SEM    | Mean $\pm$ SEM    | Mean $\pm$ SEM    |
| White blood cells ( $\times 10^3/\mu\text{L}$ )       | 8.6 $\pm$ 0.6     | 7.9 $\pm$ 1.0     | 6.3 $\pm$ 0.4     | 8.1 $\pm$ 0.2     |
| Segmented neutrophils # ( $\times 10^3/\mu\text{L}$ ) | 3.5 $\pm$ 0.2     | 3.1 $\pm$ 0.3     | 2.7 $\pm$ 0.2     | 3.5 $\pm$ 0.2     |
| Lymphocytes # ( $\times 10^3/\mu\text{L}$ )           | 1.0 $\pm$ 0.1     | 0.8 $\pm$ 0.1     | 0.7 $\pm$ 0.1     | 0.9 $\pm$ 0.2     |
| Monocytes # ( $\times 10^3/\mu\text{L}$ )             | 2.7 $\pm$ 0.2     | 2.8 $\pm$ 0.4     | 2.0 $\pm$ 0.1     | 2.1 $\pm$ 0.3     |
| Eosinophils # ( $\times 10^3/\mu\text{L}$ )           | 1.4 $\pm$ 0.1     | 1.2 $\pm$ 0.2     | 0.9 $\pm$ 0.1     | 1.5 $\pm$ 0.1     |
| Basophils # ( $\times 10^3/\mu\text{L}$ )             | 0.053 $\pm$ 0.008 | 0.035 $\pm$ 0.012 | 0.035 $\pm$ 0.006 | 0.050 $\pm$ 0.012 |
| Segmented neutrophils (%)                             | 40.9 $\pm$ 1.2    | 40.1 $\pm$ 1.5    | 42.5 $\pm$ 0.5    | 43.2 $\pm$ 2.1    |
| Lymphocytes (%)                                       | 11.0 $\pm$ 1.2    | 9.6 $\pm$ 0.6     | 11.2 $\pm$ 1.2    | 11.0 $\pm$ 2.2    |
| Monocytes (%)                                         | 31.0 $\pm$ 1.0    | 35.3 $\pm$ 2.1    | 31.5 $\pm$ 1.1    | 26.3 $\pm$ 3.5    |
| Eosinophils (%)                                       | 16.5 $\pm$ 0.8    | 14.7 $\pm$ 1.8    | 14.3 $\pm$ 1.7    | 18.9 $\pm$ 0.3    |
| Basophils (%)                                         | 0.6 $\pm$ 0.1     | 0.4 $\pm$ 0.1     | 0.5 $\pm$ 0.1     | 0.6 $\pm$ 0.2     |
| Red blood cells (%)                                   | 9.0 $\pm$ 0.3     | 9.2 $\pm$ 0.1     | 9.1 $\pm$ 0.1     | 9.0 $\pm$ 0.3     |
| Hemoglobin (g/dL)                                     | 13.7 $\pm$ 0.5    | 14.0 $\pm$ 0.2    | 14.4 $\pm$ 0.1    | 13.9 $\pm$ 0.2    |
| Hematocrit (%)                                        | 50.0 $\pm$ 1.4    | 50.7 $\pm$ 0.4    | 50.2 $\pm$ 1.2    | 49.6 $\pm$ 1.0    |
| Mean corpuscular volume (fL)                          | 55.7 $\pm$ 0.2    | 55.0 $\pm$ 0.7    | 55.4 $\pm$ 0.7    | 55.2 $\pm$ 0.7    |
| Mean corpuscular hemoglobin (Pg)                      | 15.3 $\pm$ 0.2    | 15.2 $\pm$ 0.1    | 15.9 $\pm$ 0.2    | 15.5 $\pm$ 0.3    |
| Mean corpuscular hemoglobin concentration (g/dL)      | 27.4 $\pm$ 0.4    | 27.7 $\pm$ 0.5    | 28.7 $\pm$ 0.6    | 28.1 $\pm$ 0.3    |
| Red blood cell distribution width (%)                 | 19.1 $\pm$ 0.2    | 18.7 $\pm$ 0.5    | 19.1 $\pm$ 0.4    | 18.8 $\pm$ 0.2    |
| Platelets ( $\times 10^3/\mu\text{L}$ )               | 895.8 $\pm$ 27.7  | 841.3 $\pm$ 29.8  | 757.3 $\pm$ 91.3  | 872.3 $\pm$ 26.2  |
| Mean platelet volume (fL)                             | 5.1 $\pm$ 0.04    | 4.8 $\pm$ 0.07*   | 5.0 $\pm$ 0.13    | 5.1 $\pm$ 0.07    |

Female BALB/c mice were intranasally administered with 25  $\mu\text{L}$  PBS, Lipo-Veh, Fos47 and AS01B. Whole blood was collected on days 1 or 7 after administration. N=3/group for day 1, n=4/group for day 7. \*P<0.05, Kruskal-Wallis with Dunn's post hoc test to compare to PBS.

**Table S6. Serum chemistry profiles on days 1 and 7**

| <b>Day 1</b>                | <b>PBS</b>       | <b>Lipo-Veh</b>  | <b>Fos47</b>      | <b>AS01B</b>     |
|-----------------------------|------------------|------------------|-------------------|------------------|
| <b>Parameters (units)</b>   | Mean $\pm$ SEM   | Mean $\pm$ SEM   | Mean $\pm$ SEM    | Mean $\pm$ SEM   |
| Albumin (g/dL)              | 3.9 $\pm$ 0.1    | 3.5 $\pm$ 0.1    | 3.5 $\pm$ 0.4     | 4.0 $\pm$ 0.1    |
| Alkaline phosphatase (U/L)  | 164.0 $\pm$ 10.4 | 194.7 $\pm$ 16.1 | 148.7 $\pm$ 22.3  | 180.3 $\pm$ 3.8  |
| Alanine transaminase (U/L)  | 44.7 $\pm$ 1.3   | 42.7 $\pm$ 5.9   | 33.0 $\pm$ 6.4    | 38.0 $\pm$ 3.8   |
| Amylase (U/L)               | 672.3 $\pm$ 35.6 | 815.3 $\pm$ 6.2  | 603.3 $\pm$ 127.6 | 706.7 $\pm$ 19.4 |
| Bilirubin, total (mg/dL)    | 0.2 $\pm$ 0.00   | 0.2 $\pm$ 0.00   | 0.2 $\pm$ 0.00    | 0.2 $\pm$ 0.00   |
| Blood urea nitrogen (mg/dL) | 25.0 $\pm$ 0.0   | 26.0 $\pm$ 1.0   | 21.7 $\pm$ 3.5    | 20.0 $\pm$ 0.6   |
| Calcium (mg/dL)             | 10.3 $\pm$ 0.1   | 10.0 $\pm$ 0.1   | 9.0 $\pm$ 1.2     | 10.1 $\pm$ 0.1   |
| Phosphorus (mg/dL)          | 7.5 $\pm$ 0.4    | 7.3 $\pm$ 0.4    | 5.7 $\pm$ 0.8     | 6.9 $\pm$ 0.1    |
| Creatinine (mg/dL)          | 0.2 $\pm$ 0.03   | 0.4 $\pm$ 0.09   | 0.2 $\pm$ 0.03    | 0.2 $\pm$ 0.03   |
| Glucose (mg/dL)             | 137.3 $\pm$ 4.7  | 157.0 $\pm$ 10.6 | 118.3 $\pm$ 4.9   | 132.0 $\pm$ 2.1  |
| Sodium (mmol/L)             | 154.3 $\pm$ 1.8  | 154.0 $\pm$ 1.5  | 140.3 $\pm$ 15.2  | 154.0 $\pm$ 1.2  |
| Potassium (mmol/L)          | 7.2 $\pm$ 0.1    | 7.1 $\pm$ 0.1    | 5.2 $\pm$ 1.5     | 7.0 $\pm$ 0.0    |
| Total protein (g/dL)        | 4.7 $\pm$ 0.1    | 4.3 $\pm$ 0.2    | 4.1 $\pm$ 0.5     | 4.9 $\pm$ 0.1    |
| Globulin, calculated (g/dL) | 0.8 $\pm$ 0.00   | 0.8 $\pm$ 0.09   | 0.7 $\pm$ 0.12    | 0.9 $\pm$ 0.12   |
|                             |                  |                  |                   |                  |
| <b>Day 7</b>                | <b>PBS</b>       | <b>Lipo-Veh</b>  | <b>Fos47</b>      | <b>AS01B</b>     |
| <b>Parameters (units)</b>   | Mean $\pm$ SEM   | Mean $\pm$ SEM   | Mean $\pm$ SEM    | Mean $\pm$ SEM   |
| Albumin (g/dL)              | 4.1 $\pm$ 0.1    | 4.2 $\pm$ 0.0    | 4.2 $\pm$ 0.1     | 4.3 $\pm$ 0.1    |
| Alkaline phosphatase (U/L)  | 156.8 $\pm$ 5.8  | 143.3 $\pm$ 7.7  | 154.7 $\pm$ 13.3  | 152.5 $\pm$ 3.9  |
| Alanine transaminase (U/L)  | 38.0 $\pm$ 1.8   | 57.0 $\pm$ 7.2   | 38.3 $\pm$ 6.2    | 35.8 $\pm$ 3.3   |
| Amylase (U/L)               | 627.3 $\pm$ 14.8 | 768.8 $\pm$ 76.0 | 613.0 $\pm$ 52.1  | 720.5 $\pm$ 93.7 |
| Bilirubin, total (mg/dL)    | 0.3 $\pm$ 0.03   | 0.3 $\pm$ 0.03   | 0.3 $\pm$ 0.03    | 0.3 $\pm$ 0.03   |
| Blood urea nitrogen (mg/dL) | 15.5 $\pm$ 1.3   | 18.5 $\pm$ 1.2   | 16.3 $\pm$ 1.3    | 18.5 $\pm$ 1.0   |
| Calcium (mg/dL)             | 9.7 $\pm$ 0.1    | 9.7 $\pm$ 0.1    | 9.6 $\pm$ 0.1     | 9.6 $\pm$ 0.1    |
| Phosphorus (mg/dL)          | 6.5 $\pm$ 0.23   | 6.3 $\pm$ 0.03   | 6.0 $\pm$ 0.23    | 5.7 $\pm$ 0.47   |
| Creatinine (mg/dL)          | 0.4 $\pm$ 0.1    | 0.3 $\pm$ 0.1    | 0.3 $\pm$ 0.1     | 0.2 $\pm$ 0.0    |
| Glucose (mg/dL)             | 146.5 $\pm$ 5.5  | 141.8 $\pm$ 9.1  | 138.0 $\pm$ 1.5   | 138.8 $\pm$ 6.7  |
| Sodium (mmol/L)             | 152.5 $\pm$ 0.6  | 153.3 $\pm$ 0.5  | 152.7 $\pm$ 0.9   | 153.5 $\pm$ 0.6  |
| Potassium (mmol/L)          | 6.7 $\pm$ 0.2    | 7.0 $\pm$ 0.3    | 6.3 $\pm$ 0.2     | 6.7 $\pm$ 0.3    |
| Total protein (g/dL)        | 4.8 $\pm$ 0.06   | 4.9 $\pm$ 0.04   | 4.8 $\pm$ 0.06    | 4.9 $\pm$ 0.09   |
| Globulin, calculated (g/dL) | 0.7 $\pm$ 0.04   | 0.7 $\pm$ 0.06   | 0.7 $\pm$ 0.03    | 0.7 $\pm$ 0.03   |

Female BALB/c mice were intranasally administered with 25  $\mu$ L PBS, Lipo-Veh, Fos47 and AS01B. Sera were collected on days 1 or 7 after administration. N=3/group for day 1, n=4/group for day 7, there was no statistical significance compared to PBS in each time point by Kruskal-Wallis with Dunn's post hoc test.
